# Supplementary material for: 茶樹によるフッ素・アルミニウム錯体の吸収について : 「植物中のアルミニウムとフッ素の関連性に関する研究(第3報)」
Source: Royal Society of Chemistry journal article supplement (doi:10.1039/d1an00763g), 1980-06-05
Supplement: d1an00763g1.pdf [file d1an00763g1.pdf]

**Supplementary information for:**

**Optimized detection of lung IL-6 via enzymatic liquefaction of low respiratory tract samples: application for managing ventilated patients**

Antonio Clemente,<sup>1,\*</sup> Alejandra Alba-Patiño,<sup>1,2,‡</sup> Giulia Santopolo,<sup>1,2,‡</sup> Enrique Barón,<sup>1</sup> Estrella Rojo-Molinero,<sup>3</sup> Antonio Oliver,<sup>3</sup> Jon Pérez-Bárcena,<sup>4</sup> Paz Merino de Cos,<sup>5</sup> María Aranda,<sup>6</sup> Alberto del Castillo,<sup>6</sup> Antonia Socías,<sup>6</sup> Marcio Borges,<sup>1,6</sup> and Roberto de la Rica.<sup>1,2,\*</sup>

<sup>‡</sup>These authors contributed equally.

<sup>1</sup>Multidisciplinary Sepsis Group, Health Research Institute of the Balearic Islands (IdISBa), Palma de Mallorca, Spain.

<sup>2</sup>University of the Balearic Islands, Chemistry Department, Palma de Mallorca, Spain.

<sup>3</sup>Microbiology Department, Son Espases University Hospital, Health Research Institute of the Balearic Islands (IdISBa), Palma de Mallorca, Spain.

<sup>4</sup>Intensive Care Department, Son Espases University Hospital, Palma de Mallorca, Spain.

<sup>5</sup>Intensive Care Department, Ca'n Misses Hospital, Ibiza, Spain.

<sup>6</sup>Multidisciplinary Sepsis Unit, ICU, Son Llàtzer University Hospital, Palma de Mallorca, Spain.

**Contents:**

**Table S1.** Demographic data, diagnosis, laboratory findings, treatments, ICU stay and outcomes of patients included in the study

**Figure S1.** Calibration curve of IL-6 yielded by sandwich ELISA protocol.

**Figure S2.** Bland-Altman accordance analysis of lung IL-6 levels yielded by DTT and hydrogen peroxide.

**Figure S3.** Liquefaction of respiratory samples after reducing and enzymatic procedures.

**Figure S4.** IL-6 detection on low respiratory tract samples from mechanically ventilated patients depending on infection status.

**Figure S5.** Impact of DTT on lung IL-6 assessment as predictive marker in mechanically ventilated patients.

**Figure S6.** Association between lung IL-6 and systemic inflammatory biomarkers.

**Figure S7.** Principal component analysis by using lung IL-6 measures after DTT treatment.

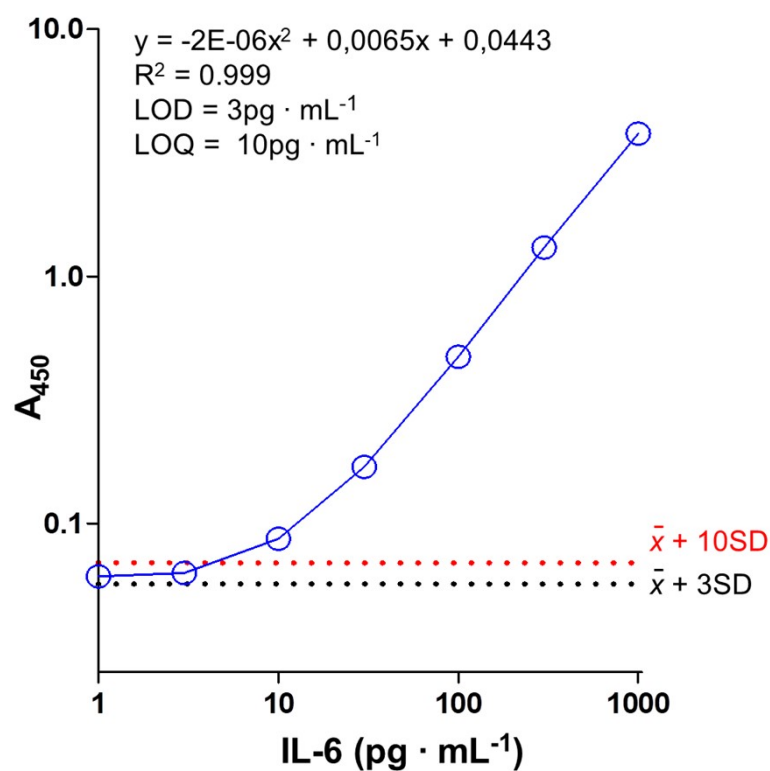

**Figure S1. Calibration curve of IL-6 yielded by sandwich ELISA protocol.** Absorbance at 450 nm (logarithmic Y axis) as a function of increasing amounts of IL-6 (logarithmic X axis). Circles represent the mean (n=3), dotted lines show the signal above 3 (black) or 10 (red) times the standard deviation of the blank. LOD, limit of detection; LOQ, limit of quantification.

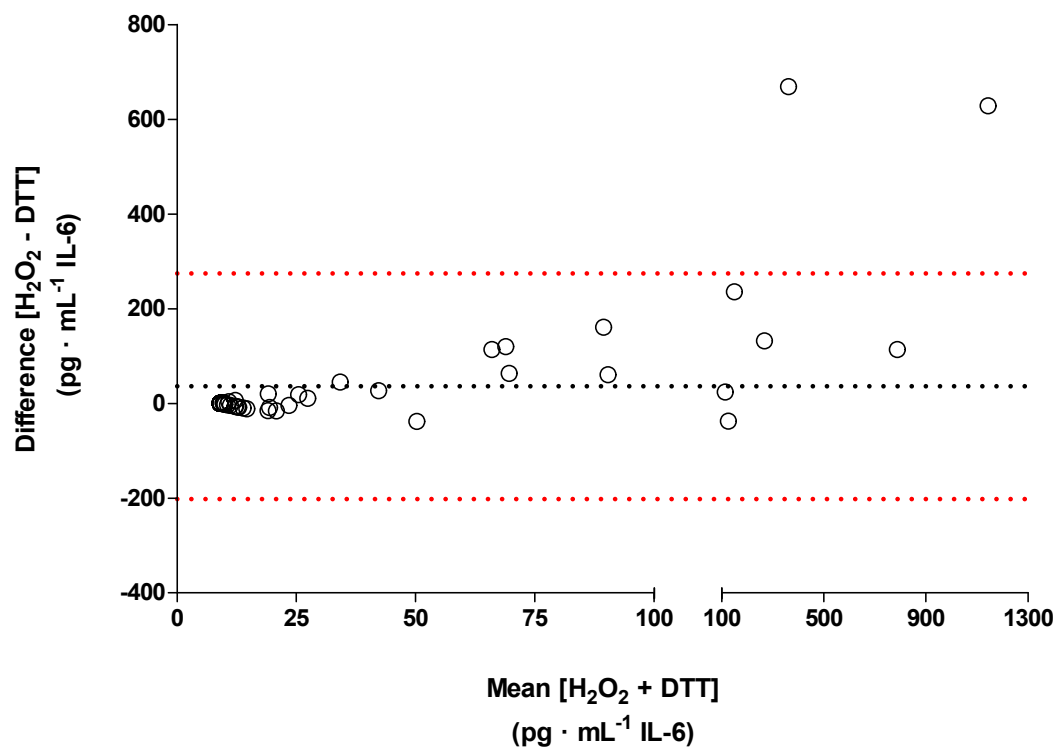

**Figure S2. Bland-Altman accordance analysis of lung IL-6 levels yielded by DTT and enzymatic liquefaction methods.** Difference (Y-axis) *versus* average (X-axis) of lung IL-6 levels detected after liquefaction of respiratory samples by the reducing (DTT) or enzymatic (H<sub>2</sub>O<sub>2</sub>) method. Dotted lines represent the bias (black) and the 95% limits of agreement (red).

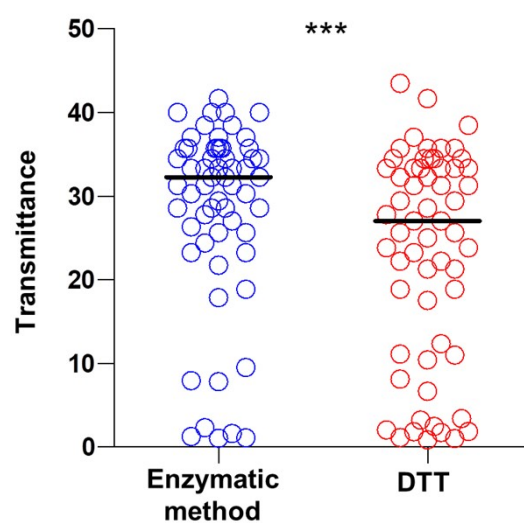

**Figure S3. Liquefaction of respiratory samples after reducing and enzymatic procedures.** Turbidimetry (transmittance) of low respiratory tract samples after enzymatic (blue) or reducing (red) treatments. Horizontal bars represent the median. \*\*\* $p$ -value <0.0001 was obtained with a Wilcoxon paired test.

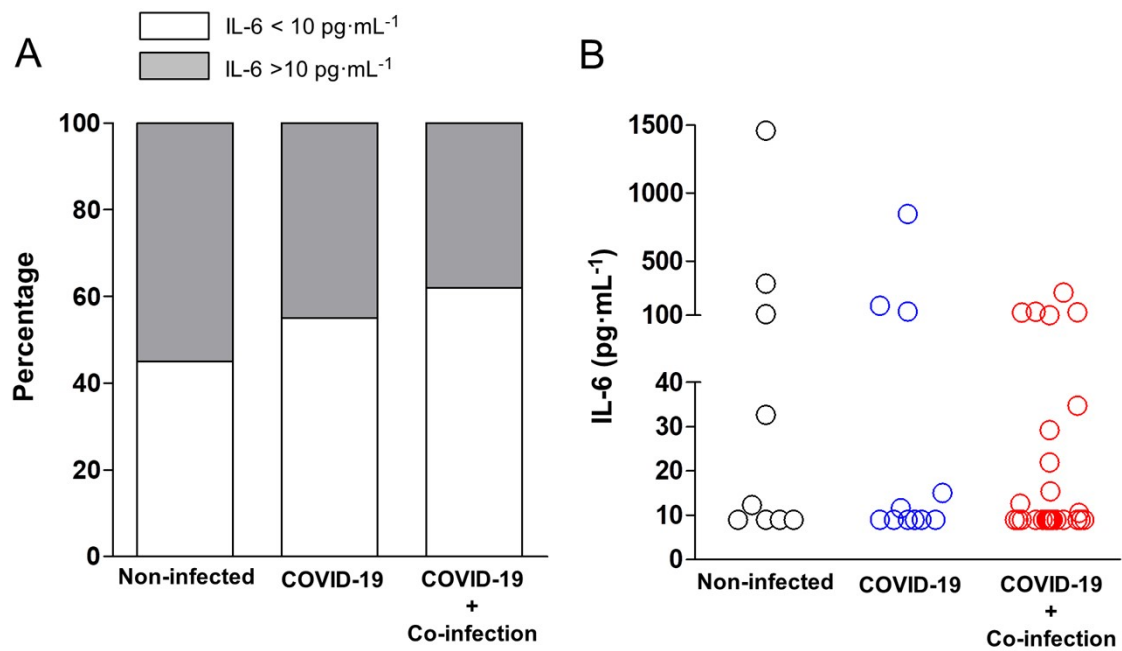

**Figure S4. IL-6 detection on low respiratory tract samples from mechanically ventilated patients depending on infection status.** (A) Negative (white) and positive (grey) rates (%) for IL-6 test in low respiratory tract samples from patients without respiratory infection (n=9) and COVID-19 patients with (n=26) or without (n=11) bacterial co-infection (Fisher exact test,  $p>0.05$ ). (B) Similar IL-6 levels in low respiratory tract samples with a positive IL-6 test ( $>10$  pg·mL<sup>-1</sup>) between patients without infection (black), COVID-19 patients (blue) and COVID-19 patients with a bacterial co-infection (red) (Kruskall Wallis test,  $p>0.05$ ). Data refer to IL-6 detected on low respiratory tract samples after enzymatic liquefaction.

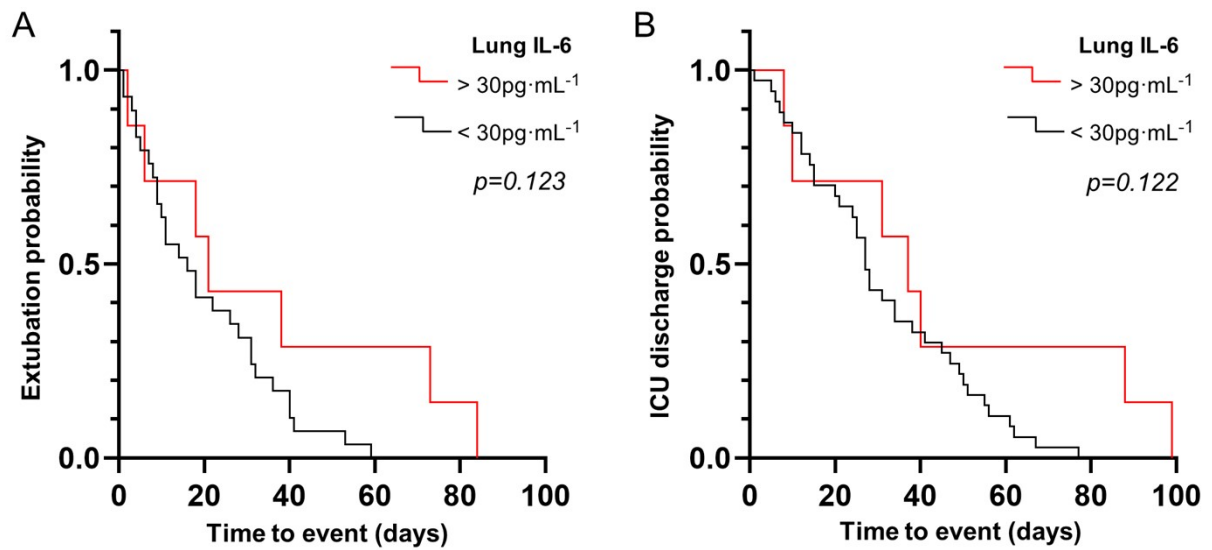

**Figure S5. Impact of DTT on lung IL-6 assessment as predictive marker in mechanically ventilated patients.** Cutoff IL-6 value yielded by AUC-ROC method was used to classify patients in a survival analysis to evaluate the expected time of (C) mechanical ventilation needs and (D) ICU admission. Data refer to IL-6 detected on low respiratory tract samples after liquefaction by reducing DTT.

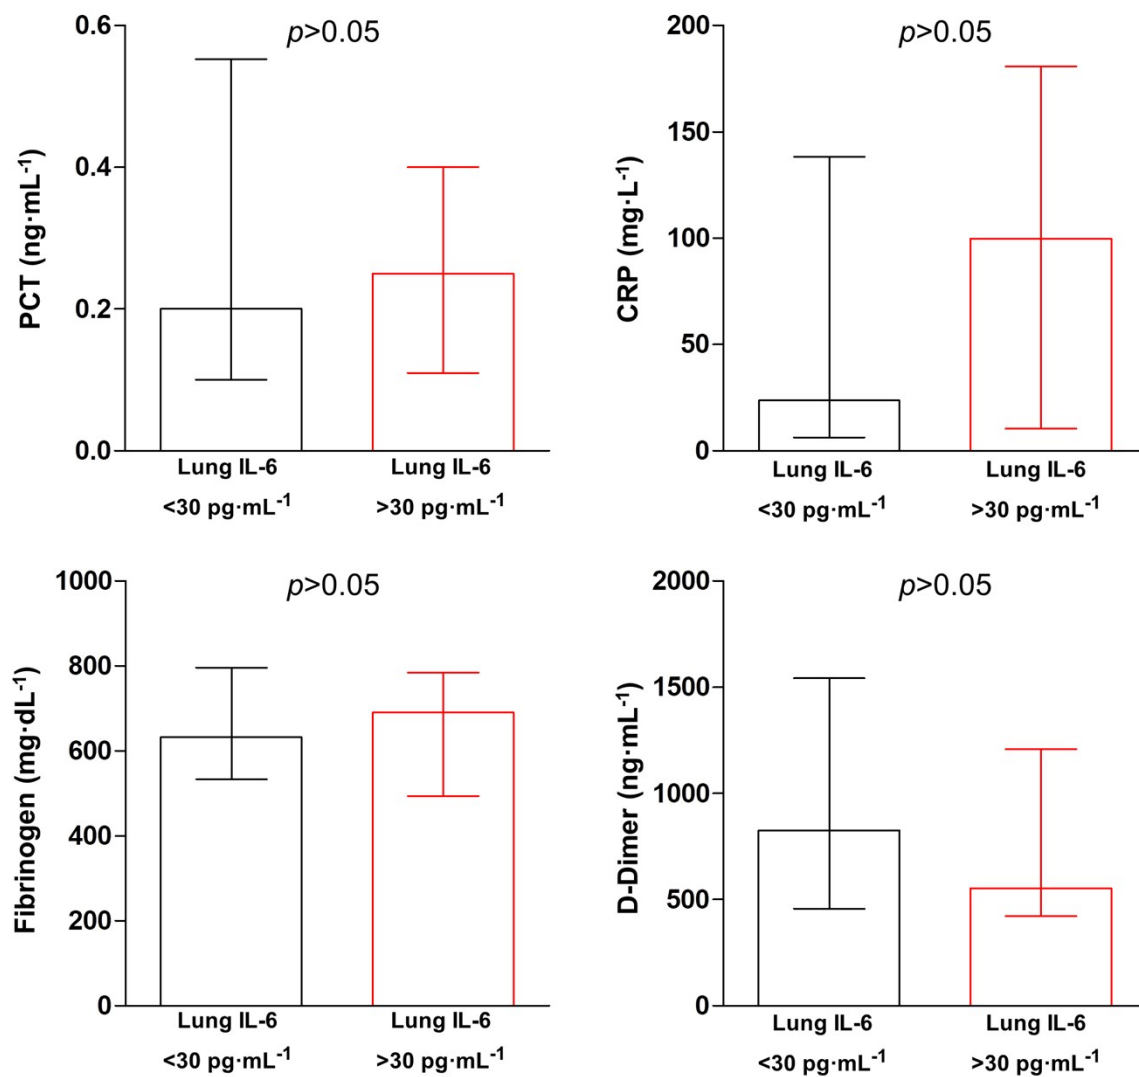

**Figure S6. Association between lung IL-6 and systemic inflammatory biomarkers.** Similar serum levels of procalcitonin (PCT), C-reactive protein (CRP), fibrinogen and D-Dimer between mechanically ventilated patients with lung IL-6 levels below (black) and above (red) the cutoff value proposed by the AUC-ROC analysis in Figure 4 of the main text (Mann-Whitney test,  $p > 0.05$ ). Data are expressed as medians and interquartile range (25th and 75th percentiles).

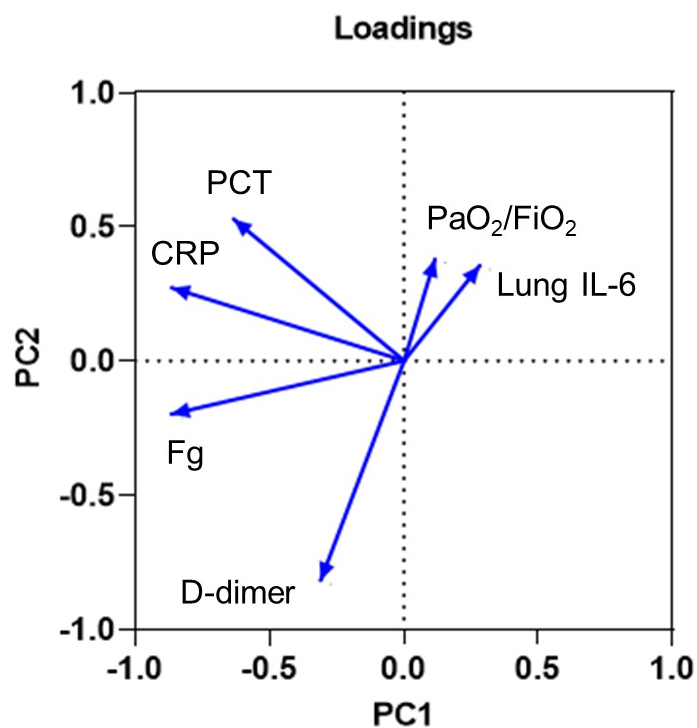

**Figure S7. Principal component analysis by using lung IL-6 measures after DTT treatment.** Relationships between local variables (lung IL-6 levels and PaO<sub>2</sub>/FiO<sub>2</sub> values) and systemic variables [(D-dimer, fibrinogen (Fg), C-reactive protein (CRP) and procalcitonin (PCT)]. Data refer to IL-6 detection on low respiratory tract samples after liquefaction with DTT.
